# Supplementary material for: Identification of novel selective MMP-9 inhibitors as potential anti-metastatic lead using structure-based hierarchical virtual screening and molecular dynamics simulation
Source: Royal Society of Chemistry journal article supplement (doi:10.1039/c6mb00066e), 2016-05-09
Supplement: c6mb00066e1.pdf [file c6mb00066e1.pdf]

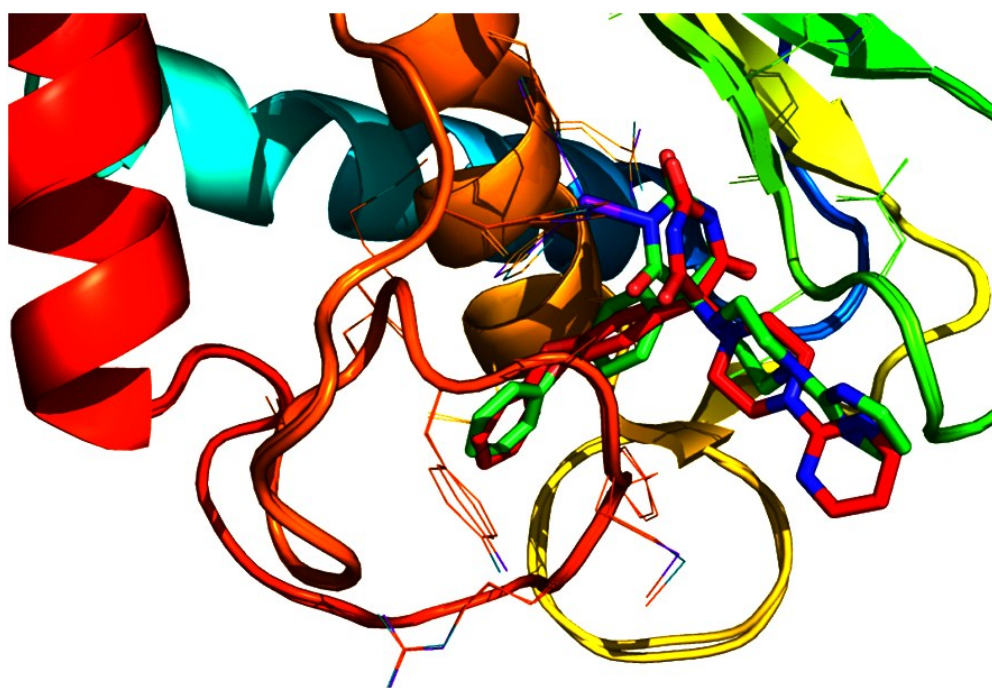

**Fig. S1.** Docking Program Validation: Alignment of the redocked (red) and co-crystal ligand (green) binding pose using the glide docking module.

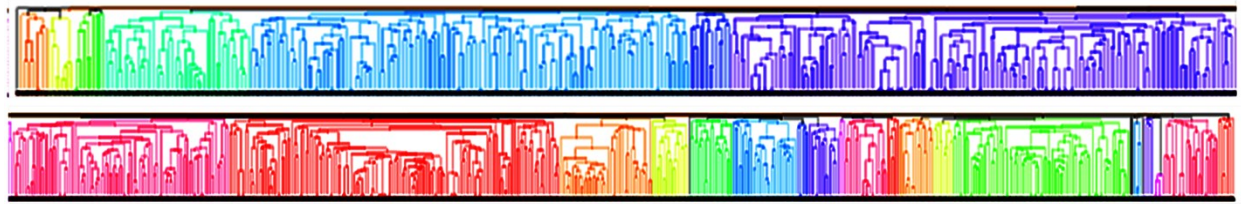

**Fig.S2.** Hierarchical clustering of the structure based hits obtained during pharmacophore based screening

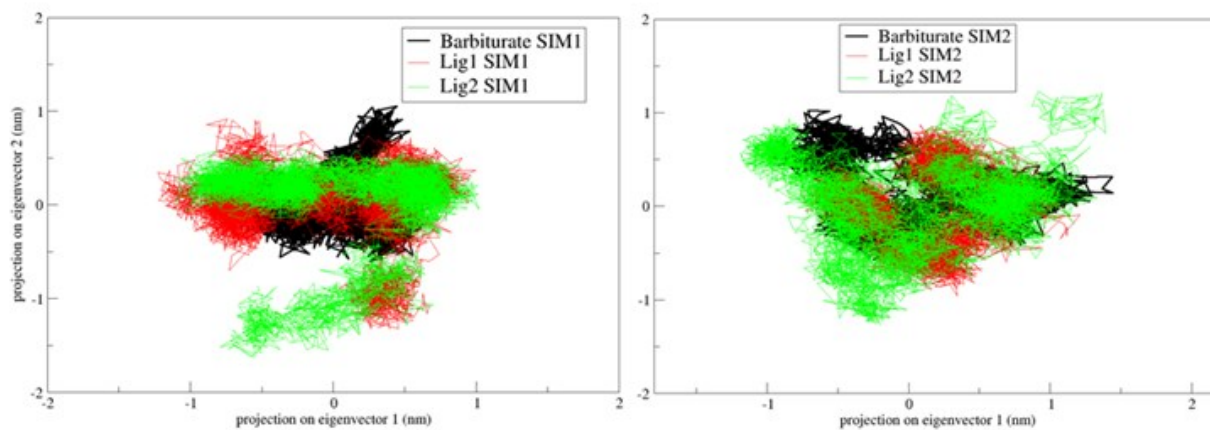

**Fig S3:** Principal component Analysis (PCA) plot for three individual trajectories for Lig-1,Lig-2 and Barbiturate complex in both SIM1 and SIM2.
